# Supplementary material for: Anchoring Si nanoparticles to carbon nanofibers: an efficient procedure for improving Si performance in Li batteries
Source: Royal Society of Chemistry journal article supplement (doi:10.1039/c0jm01811b), 2010-11-08
Supplement: c0jm01811b.pdf [file c0jm01811b.pdf]

## SUPPORTING INFORMATION

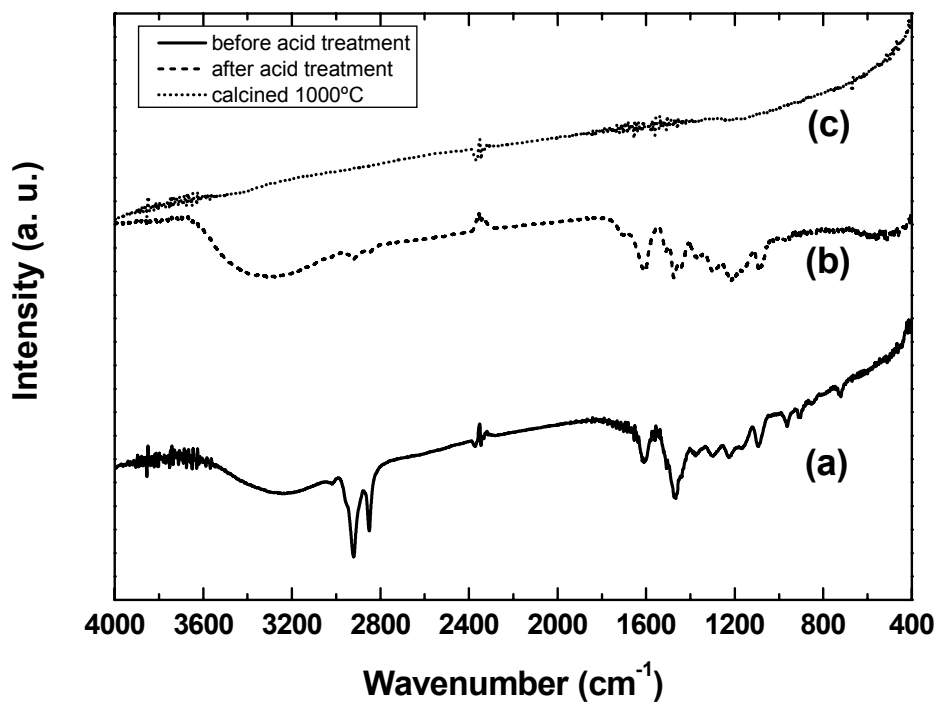

**Figure S1:** IR spectra for the Si/RF composites (a) before and (b) after acid treatment. (c) IR spectrum for the Si/SiO<sub>x</sub>/C composite B.

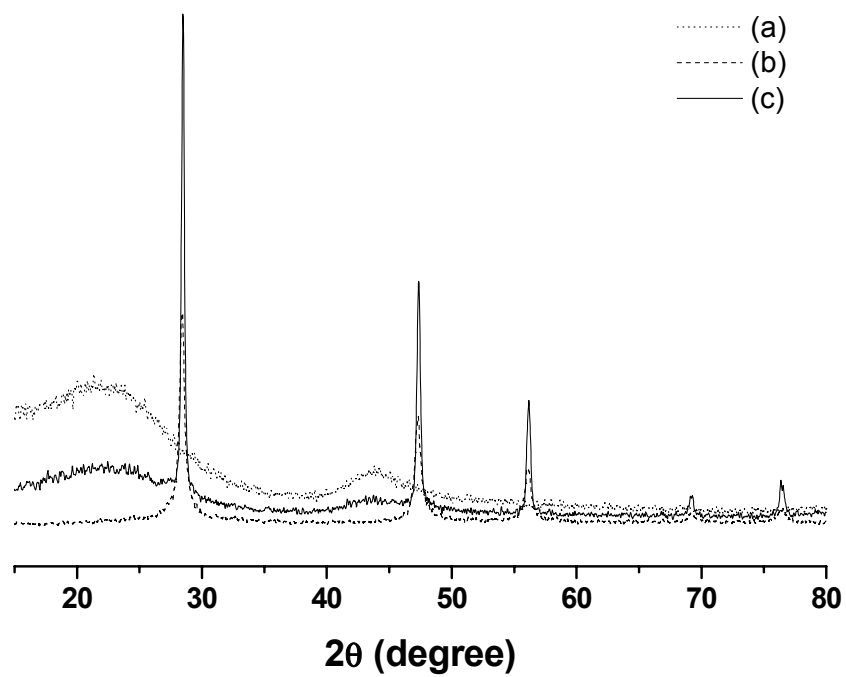

**Figure S2:** XRD patterns for (a) pristine carbon nanofibers, (b) pure Si and (c) the Si/SiO<sub>x</sub>/C composite B.

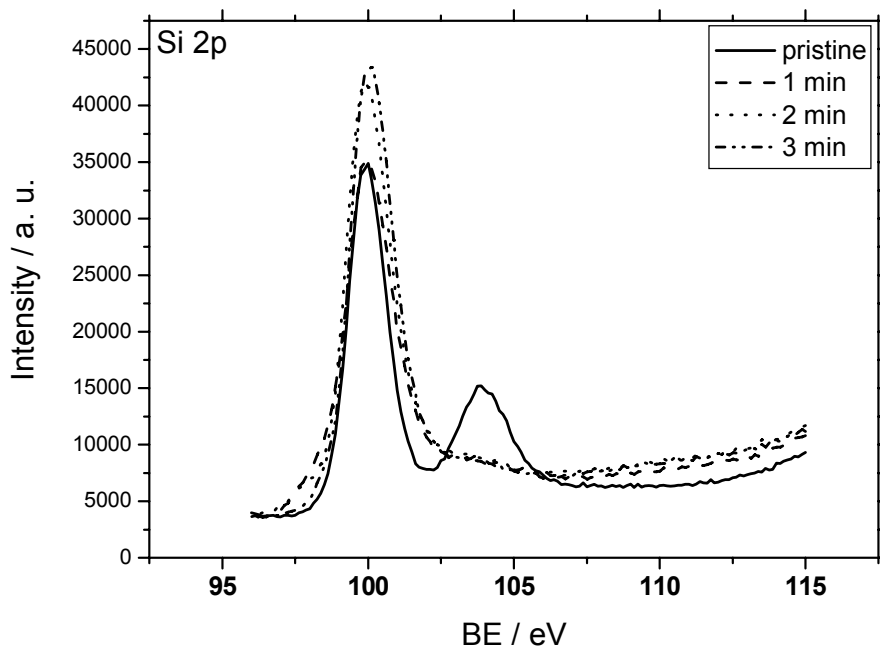

**Figure S3:** XPS 2p Si spectra obtained after a variable sputtering time. Sample: pure Si.

The peak at 104.2 eV, was assigned to the existence of SiO<sub>2</sub>, only was observed on surface, disappearing after 1 min of Ar<sup>+</sup> sputtering. This means that the silicon oxide film is very thin, < 3 nm.

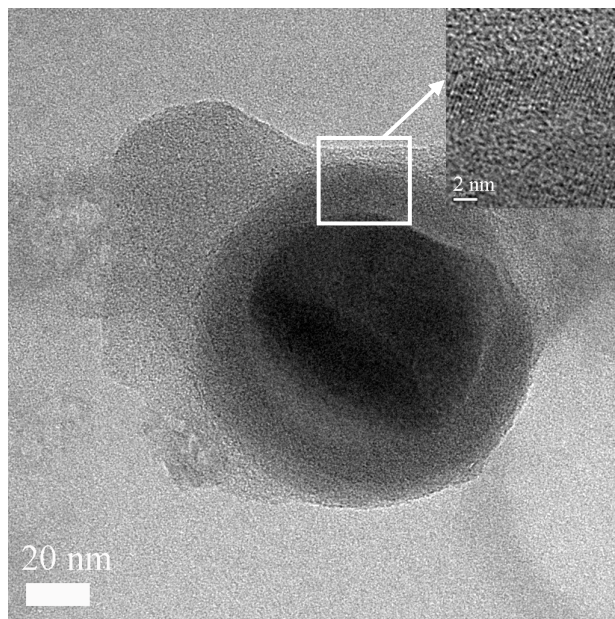

S4. TEM image of particle attached onto fibers in composite A after the 50<sup>th</sup> charge.
